# Supplementary material
Source: publisher figshare collection journal article supplement (https://gsajournals.figshare.com/ndownloader/files/13530215)

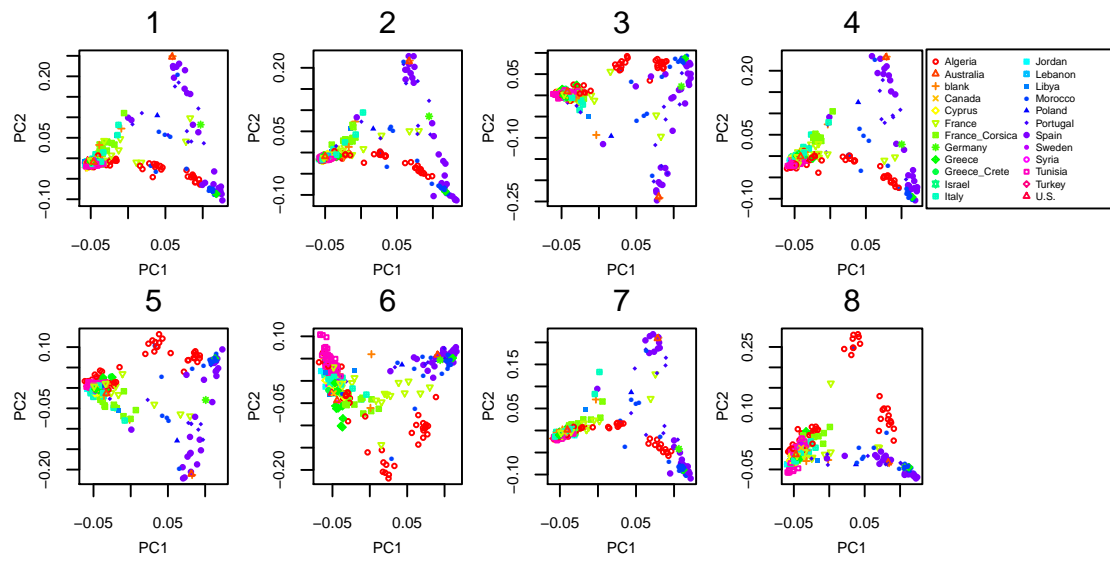

Figure S3: PCA plots for all 8 chromosomes in the *Medicago truncatula* dataset.

Supplement: Supplementary file 1 [file 13530215]
